# 1 Meningeal lymphatic endothelial cells fulfill scavenger 2 endothelial cell function and employ Mrc1a for cargo uptake

3 Yvonne Padberg<sup>1,2,3</sup>, Andreas van Impel<sup>1,2,3</sup>, Max van Lessen<sup>1,2,3</sup>, Jeroen Bussmann<sup>4</sup>, Stefan Schulte-Merker<sup>1,2,3</sup>

- 4 1. Institute of Cardiovascular Organogenesis and Regeneration, WWU Münster, Münster,  
5 Germany  
6 2. Faculty of Medicine, WWU Münster, Münster, Germany  
7 3. Cells-in-Motion Cluster of Excellence, WWU Münster, Münster, Germany  
8 4. Leiden Academic Center for Drug Research, Leiden University, Leiden, The Netherlands.

## 9 Contribution

10 YP: Conceptualization, Formal analysis, Validation, Methodology, Writing; AvI: Conceptualization,  
11 Validation, Methodology, Supervision; MvL: Validation; JB: Conceptualization, Validation, Methodology;  
12 SS-M: Conceptualization, Formal analysis, Supervision, Funding acquisition, Validation, Methodology,  
13 Writing—review and editing

14

## 15 Author for correspondence

16 Stefan Schulte-Merker  
17 [schultes@ukmuenster.de](mailto:schultes@ukmuenster.de)  
18 Phone: +49 251 980 2874

## 19 Abstract

20 Brain lymphatic endothelial cells (BLECs) constitute a group of loosely connected endothelial cells within  
21 the meningeal layer of the zebrafish brain. We previously reported that BLECs efficiently endocytose  
22 extracellular cargo molecules (van Lessen et al., 2017), but how this is accomplished and controlled on  
23 the molecular level remains unclear. We here compare BLECs to scavenging endothelial cells (SECs) in  
24 the embryonic cardinal vein and find them to accept an identical set of substrate molecules. While there  
25 is redundancy in the type of scavenger receptors being used, the two cell populations rely for specific  
26 substrate molecules on different cell surface receptors to mediate their physiological role: Stab2  
27 appears more critical within SECs in the cardinal vein, while BLECs depend more on the Mrc1a receptor  
28 for internalization of cargo. Given the striking similarities to the substrate specificity of cardinal vein  
29 SECs, we postulate that BLECs qualify functionally as SECs of the brain.

30

31

32

## 33 Introduction

34

35 The lymphatic vascular system constitutes a blind-ended network that drains interstitial fluid and  
36 macromolecules from tissues and organs and eventually returns its contents back into the blood  
37 circulation. Furthermore, lymphatics are essential for immune cell trafficking and fat absorption in the  
38 intestine (Schulte-Merker et al., 2011) . For a long time, the brain was considered to be devoid of  
39 lymphatic vessels, but recently a lymphatic vascular network in the dura mater of the mouse meninges  
40 was (re-)discovered (Mascagni and Bellini, 1816, Aspelund et al., 2015, Louveau et al., 2015). Lymphatic  
41 vessels are located in the immediate proximity of the meningeal blood vasculature where they drain  
42 cerebral interstitial fluid (ISF), macromolecules and cerebrospinal fluid (CSF) into deep cervical lymph  
43 nodes (Aspelund et al., 2015, Louveau et al., 2015). They develop postnatally, originating around the  
44 foramina that form the entry and exit sites for the blood vessels (BVs) and nerves, and migrate along  
45 blood vessels and the cranial and spinal nerves, eventually resulting in a fully developed lymphatic  
46 system at P28 (Antila et al., 2017). The meningeal lymphatic system appears to be conserved across  
47 mammals and has been described in humans and non-human primates (Absinta et al., 2017). Whether  
48 and how meningeal lymphatics might contribute to the waste removal of the brain has not been  
49 experimentally addressed but is a topic of significant interest, since accumulation of protein aggregates  
50 is one of the hallmark features of neurodegenerative diseases (Metcalf et al., 2012).

51 Recently we and others have demonstrated the presence of lymphatic endothelial cells in the meningeal  
52 layer of the zebrafish brain (Bower et al., 2017, Venero Galanternik et al., 2017, van Lessen et al., 2017).  
53 Due to the simultaneous but independent discovery of these cells, they were termed either brain  
54 lymphatic endothelial cells (BLECs) (van Lessen et al., 2017), mural lymphatic endothelial cell (Bower et  
55 al., 2017), or fluorescent granular perithelial (FGP) cells (Venero Galanternik et al., 2017) - all terms  
56 referring to the same cell type. These cells express lymphatic marker genes such as *prox1a*, *lyve-1* and  
57 *flt4* (*vegfr3*), develop in a *Vegfc*, *Flt4* and *Ccbe1*-dependent manner and populate the meningeal layer of  
58 the brain. Even though BLECs are in close proximity to the meningeal blood vasculature, they do not  
59 share – in contrast to pericytes - a common basement membrane with the endothelial cells (van Lessen  
60 et al., 2017). Whole transcriptome profiling of sorted BLECs confirmed that BLECs are a distinct  
61 endothelial cell population, which show expression profiles different from macrophages and pericytes,  
62 while expressing lymphatic markers such as *flt4*, *lyve-1*, *prox1a* (Bower et al., 2017, van Lessen et al.,  
63 2017). In addition, inhibition of myelopoiesis by administration of a pu.1 (*spi1b*) morpholino does not  
64 affect BLEC development, demonstrating that these cells do not constitute a macrophage lineage.  
65 Remarkably these cells do not form any vascular structure, but give rise to a network consisting of  
66 individual lymphatic endothelial cells expanding over the whole brain surface (van Lessen et al., 2017,  
67 Venero Galanternik et al., 2017, Bower et al., 2017).

68 BLECs originate from the venous choroidal vascular plexus behind the eye and sprout around 56hpf, at  
69 which point they downregulate blood vascular specific genes and upregulate lymphatic markers such as  
70 *flt4*. Sprouting occurs bilaterally and cells migrate along the mesencephalic vein (MsV), resulting in  
71 symmetric loops of single cells that cover the optic tectum (TeO) of the zebrafish embryo. This network  
72 of individual cells subsequently expands throughout the development of the fish and covers the whole  
73 surface of the brain at around 3 weeks of age. BLECs have been shown to play a role in regenerative  
74 processes within the brain (Bower et al., 2017, Chen et al., 2019), and have an enormous ability to take  
75 up extracellular substances into subcellular vesicles in a process depending on receptor-mediated  
76 endocytosis (RME) (van Lessen et al., 2017). Previously we have shown that the uptake of avidin coupled  
77 to pHrhodo which is a pH-sensitive tag that only fluoresces upon internalization into the acidic  
78 compartment of the lysosome, can be blocked by mannan. This suggests that the mannose receptor is  
79 involved in the uptake of avidin. In line with the high endocytotic capacity of these cells, which becomes

80 evident immediately upon sprouting from the choroidal vascular plexus, BLECs typically have large  
81 spherical vacuoles which are interpreted as lysosomal compartments in adult brains (van Lessen et al.,  
82 2017, Venero Galanternik et al., 2017).

83 Another endothelial subpopulation, that has been reported to possess a high endocytotic capacity, are  
84 scavenger endothelial cells (SECs). In all terrestrial vertebrates this specialized cell population is located  
85 in the liver sinusoids and termed liver sinusoidal endothelial cells. In teleost fish, sharks and lampreys it  
86 was identified in various other organs (Seternes et al., 2002). In embryonic zebrafish, SECs were recently  
87 shown to be present in several large veins, including the posterior and common cardinal vein (PCV, CCV),  
88 and the caudal vein (CV) where they clear substances, colloidal waste and viral particles from the blood  
89 circulation as early as 28hpf. The uptake of cargo molecules by SECs in the CV is mainly dependent on  
90 the transmembrane receptor *stabilin-2* (Campbell et al., 2018). The questions arise whether BLECs  
91 possibly represent a functional equivalent of this cell population serving scavenger functions of the brain  
92 and whether they might substitute for the absence of lymphatic vessels in teleost meninges.

93 Here we explore this hypothesis and compare BLECs with SECs in the CV to study the physiological role  
94 of BLECs. We have generated and analyzed mutants for some of the classical cargo receptor molecules  
95 and tested whether they are required for the internalization of cargo into BLECs. We showed that BLECs  
96 are highly endocytic cells, which are considerably more efficient in macromolecular uptake for the  
97 tested substrate than microglia. BLECs and SECs in the CV have the same substrate specificity and take  
98 up a range of macromolecules including proteins, liposomes, lipoproteins, polysaccharides and  
99 glycoaminoglycans. Due to the efficiency of cargo internalization and the similarities of the type of cargo  
100 they are able to endocytose, we conclude that BLECs qualify as a novel population of –scavenger  
101 endothelial cells residing in the brain area. Surprisingly, we find that both cell populations depend on  
102 different receptors mediating endocytosis.

## 103 Results

104

### 105 BLECs and SECs within the caudal vein share the same substrate specificity

106 In order to investigate the function of BLECs in the zebrafish embryo, we directly compared SECs in the  
107 CV with BLECs. To this end we injected the same macromolecules either into the optic tectum of  
108 embryos (Figure 1 A-J) or into the blood circulation (Figure 1 K-U) at 5dpf to compare the substrate  
109 specificity of both cell populations. In most cases at least two dyes were co-injected and the intracellular  
110 uptake was monitored. We used different classes of dye-conjugated substrate molecules, including  
111 liposomes (DOPG liposomes - Figure 1D, U), modified lipoproteins (oxidated-LDL - 1F, Q),  
112 glycoaminoglycans (not shown), proteins such as Avidin (Figure 1 G, R), Transferrin (Figure 1H, S) and  
113 Amyloid- $\beta$  (Figure 1 J, P) and the polysaccharide dextran (Figure 1 E, T). Without exception, these  
114 molecules or particles were taken up by both cell populations, suggesting that they share the same  
115 substrate specificity (Figure 1V), even though the two cell populations serve two completely different  
116 anatomical and physiological compartments: BLECs clear the ventricles and the brain extracellular space  
117 from macromolecules, while SECs in the CV filter out substrates from the blood stream.

### 118 BLECs are more efficient in tracer uptake than macrophages

119 A major open question is which function BLECs fulfill on the surface of the brain. Our initial results  
120 suggested a role in clearance of extracellular waste products. However, microglia have always been  
121 considered as the major force to remove cellular or sub-cellular components from the brain (Platt et al.,  
122 1998). We therefore asked how the endocytic capacity of microglia compares to that of BLECs. We  
123 injected IgG-Alexa647 into *lyve-1:dsRed;mpeg:GFP* double transgenic embryos that allow the

124 discrimination of BLECs and microglia (Figure 2A). We confirmed that IgG-Alexa647 was taken up by  
125 nearly all of the *mpeg:GFP*<sup>+</sup> microglia (Figure 2B). Surprisingly, the fluorescence of IgG-Alexa647 that  
126 accumulated in the vacuoles of the microglia was significantly lower in intensity than that of IgG-  
127 Alexa647 accumulating in the BLECs (Figure 2C red/white arrow heads). In order to quantify this  
128 phenomenon and to analyze the dynamics of the dye uptake, IgG-Alexa647 was injected into 5dpf  
129 embryos and the fluorescence intensity of IgG-Alexa647 signal in BLECs was quantified (Region 1 and 2  
130 depicted in Figure D-D'' and E) and compared to the intensity of the region between the 2 loops (region  
131 3, Figure D-D'' and E), where *mpeg:GFP* positive microglia are located, at 1 hour post injection (hpi),  
132 3hpi and 6hpi. At all three time points, BLECs were found to take up significantly more IgG-Alexa647  
133 than *mpeg* positive microglia (Figure 2H, n=6 1hpi\*\* p<0,005; 3hpi \*\*p<0,005; 6hpi \*\*p<0,005). Hence,  
134 while microglia are in closer proximity to the ventricles in which the dye has been injected, BLECs were  
135 still an order of magnitude more efficient in the internalization of IgG-Alexa647.

### 136 *mrc1a* mutant zebrafish show an increase in BLEC numbers

137 The mannose receptor Mrc1a has previously been shown to be highly expressed in BLECs and is  
138 suggested to mediate endocytosis of at least one substrate - avidin - via receptor-mediated endocytosis  
139 (van Lessen et al., 2017). In mice, the mannose receptor is maintaining homeostasis of macromolecules  
140 in the blood and is responsible for the uptake of Lutrophin (Mi et al., 2002), denaturated collagens  
141 (Malovic et al., 2007) and serum glycoproteins including most lysosomal hydrolases (Lee et al., 2002).  
142 We have previously shown that mannan, which is a bacterial polysaccharide binding very efficiently to  
143 the mannose receptor (Sallusto et al., 1995), could block the uptake of pHr coupled Avidin by BLECs (van  
144 Lessen et al., 2017). However, other mannan-binding proteins such as mannan-binding lectin exist. In  
145 order to investigate whether zebrafish Mrc1a is mediating the removal of macromolecules from the  
146 brain and acts as a clearance receptor, we generated a mutant for *mrc1a* harbouring a frameshift  
147 mutation within exon4 (Figure 3A). Homozygous mutants did not show any obvious lymphatic or blood  
148 vessel phenotype at 5dpf (Figure 3 B,C), and were identified in a normal Mendelian ratio as viable and  
149 fertile adults.

150 Interestingly, upon quantification of the number of BLECs in both loops of the optic tectum of the 5dpf  
151 zebrafish brain in double transgenic embryos *lyve-1:dsRed;fli1a:nucGFP*, we found a highly significant  
152 increase (56%) in BLEC numbers in *mrc1a* mutants compared to sibling controls (Figure 3E). The  
153 difference in cell numbers between heterozygous and homozygous *mrc1a* embryos was already visible  
154 at 4dpf (data not shown). This increase in BLEC cell number was also evident in whole brains of adult  
155 *mrc1a* mutant fish. In addition, we found that BLECs display an altered morphology in adult *mrc1a*  
156 mutants (Figure 3F).

### 157 *mrc1a* mutants are deficient in pHr-Avidin uptake

158 When IgG-Alexa647 and pHr-Avidin was co-injected into an *mrc1a*<sup>+/-</sup> incross, we found that siblings show  
159 an uptake of both dyes into BLECs, whereas *mrc1a* mutant embryos only endocytosed IgG-Alexa647 but  
160 did not take up pHr-Avidin (Figure 3D). We repeated the experiments co-injection of mannan with IgG-  
161 Alexa647 (van Lessen et al., 2017) and found that IgG-Alexa647 was not only retained at the plasma  
162 membrane level, but was completely endocytosed into BLECs whereas pHr-Avidin uptake was blocked  
163 completely after mannan administration. When we injected pHr-Avidin first, followed by mannan and  
164 IgG-Alexa647, the two dyes were indeed found in identical lysosomes (Supplement S1). We conclude  
165 that competitive inhibition using mannan phenocopies the *mrc1a* mutant phenotype. Analysis of *mrc1a*  
166 mutants demonstrated that the endocytotic uptake of pHr-Avidin, but not of IgG-Alexa647 by BLECs  
167 depends on the Mrc1a receptor.

168

169

## 170 BLECs and SECs in the CV have different molecular mechanisms for dye internalization

171 Stabilin-2 (Stab2) has recently been found to represent an essential receptor for SEC function in the  
172 zebrafish caudal vein, clearing the circulation from nanoparticles such as fluorescently labelled  
173 hyaluronic acid (fluHA) and liposomes (Campbell et al., 2018) (Figure 4A). We therefore asked whether  
174 Mrc1a also mediates macromolecule uptake within the caudal vein and whether there is redundancy  
175 between Mrc1a and Stab2.

176 To answer these questions, we generated *mrc1a*<sup>-/-</sup>;*stab2*<sup>-/-</sup> double mutants and compared substrate  
177 specificity in wt, *mrc1a*<sup>-/-</sup>, *stab2*<sup>-/-</sup> and double mutants. We found that the internalization of two known  
178 substrates for SEC clearance in the caudal vein - hyaluronic acid and DOPG-liposomes -were affected  
179 only in *stab2* single and *mrc1a*<sup>-/-</sup>;*stab2*<sup>-/-</sup> double mutants. Single *mrc1a* mutants, however, did not exhibit  
180 any defects, indicating that Mrc1a is not essential for clearance of these ligands (Figure 4 A). Next we  
181 wanted to assess the importance of *mrc1a* and *stab2* for the uptake of hyaluronic acid and DOPG  
182 liposomes in BLECs. Interestingly, neither *stab2*<sup>-/-</sup> or *mrc1a*<sup>-/-</sup> single, nor *mrc1a*<sup>-/-</sup>;*stab2*<sup>-/-</sup> double mutants  
183 showed a defect in endocytosis of DOPG liposomes or hyaluronic acid in BLECs (Figure 4B) suggesting  
184 that other receptors must be involved in the endocytosis of these substrates. These results indicate,  
185 that even though SECs in the CV and BLECs have identical substrate specificity, there are important  
186 differences in the clearance mechanisms between the two cell types.

187 Since zebrafish Mrc1a is essential for the internalization of pHr-Avidin in BLECs, we wondered whether  
188 the Mrc1a receptor is mediating preferentially protein uptake in either BLECs or caudal vein SECs. We  
189 therefore tested the uptake of additional proteins such as pHr-Avidin, IgG-Alexa647, transferrin and  
190 amyloid-β in both cell types in the different mutants. Interestingly, neither Mrc1a nor Stab2 are essential  
191 for protein uptake by the SECs of the caudal vein from the blood plasma (Figure 4C). Similarly, when we  
192 analyzed the BLECs, we found that nearly all proteins were still cleared from the brain in *mrc1a*, *stab2*  
193 and double mutant embryos. Also the endocytosis of modified lipoproteins (acetylated and oxidized  
194 LDL) and dextran by BLECs and SECs was unaffected (Supplemental Figure 2). The only exception was  
195 pHr-Avidin, whose uptake by BLECs is completely blocked in the *mrc1a*<sup>-/-</sup> single and *mrc1a*<sup>-/-</sup>;*stab2*<sup>-/-</sup>  
196 double mutants (Figure 4D, E).

## 197 *mrc1a*<sup>-/-</sup> BLECs are less efficient in the uptake of dextran and IgG-Alexa647

198 Although all tested molecules (except for pHr-Avidin) and particles were still endocytosed by BLECs in  
199 *mrc1a* mutants, we noticed differences in the amount of endocytosed material between the different  
200 genotypes in some instances. To quantify this effect, we co-injected acLDL-488, pHr-Dextran and IgG-  
201 Alexa647 into *mrc1a* mutants and siblings and subsequently measured the fluorescence intensity of the  
202 dye accumulating in the vesicles of the BLECs as depicted in Figure 5A and B. Importantly, this analysis  
203 demonstrated that the amount of pHr-Dextran and IgG-Alexa647 accumulating in the vesicles of *mrc1a*  
204 mutant BLECs was significantly reduced compared to wild type sibling controls (t-test, \*\*\*\* p<0.0001).  
205 The amount of endocytosed acLDL was unaltered in *mrc1a* mutants. This shows that even though the  
206 *mrc1a* mutant fish can still endocytose pHr-Dextran and IgG-Alexa647 in the absence of a functional  
207 Mrc1a receptor, dye internalization is much less efficient suggesting that the uptake of dextran and IgG-  
208 Alexa647 are partially mediated by *mrc1a*.

209 Taken together, our results demonstrate that BLECs are highly endocytic cells that accept the same  
210 substrate molecules as SECs in the CV and qualify as scavenger endothelial cells of the brain. However,  
211 the two cell populations rely at least in parts on different receptor molecules for cargo internalization.  
212 Whereas Mrc1a is essential for endocytosis in BLECs and thereby likely plays an essential role in waste  
213 removal from the brain, it is not crucial for waste removal from the blood by SECs in the CV. On the

214 other hand, Stab2 is essential for internalization of selected substrates by the caudal vein SECs, but  
215 appears dispensable for BLECs.

## 216 Discussion

217 Clearance of macromolecules from the brain parenchyma is a crucial process and has always been  
218 considered to be carried out by microglia in vertebrates. Recently, teleost BLECs were discovered, which  
219 cover the meningeal layer of the optic tectum and other parts of the brain as an extensive network of  
220 loosely connected cells in close proximity to blood vessels. They remain as single cells and never form  
221 lumenized structures, even after having expanded significantly during growth of the individual. The  
222 question which function these cells fulfill under normal physiological conditions has not been answered.  
223 In response to cerebrovascular damage, however, BLECs are able to populate the brain parenchyma  
224 and can fulfill a guidance function for regrowing blood vessels (Chen et al., 2019).

225 It is striking that within the same anatomical compartment (meninges) of teleosts and mammals there  
226 are lymphatic endothelial cells to be found, but that these cells form different structures while still  
227 possibly serving similar physiological functions such as waste removal. Since BLECs cannot, in the  
228 absence of lumenized vessels, mechanistically work the same way as mammalian lymphatics, we here  
229 investigated whether BLECs represent a scavenger endothelial cell population of the brain. We  
230 compared BLECs to a recently discovered SECs in the CV of the zebrafish embryo, which has been  
231 demonstrated to clear the blood from macromolecules (Campbell et al., 2018), and in that sense are  
232 functionally homologous to mammalian liver sinusoidal endothelial cells. While trying numerous  
233 different substrate classes such as proteins, liposomes, lipoproteins, polysaccharides and  
234 glycoaminoglycans, we could not find any difference in the substrate specificity of caudal vein SECs and  
235 BLECs. We therefore conclude that BLECs function as *bona fide* scavenger endothelial cells.

236 Since microglia were always considered to constitute a cleaning mechanism which responds efficiently  
237 to tissue damage and infection by engulfing and processing pathogens (Platt et al., 1998), we studied  
238 the functional capacity of BLECs and microglia in direct comparison and analyzed how BLECs behave  
239 compared to macrophages in terms of internalization of cargo. Apart from their single cellular  
240 morphology and the expression of the mannose receptor, they have little in common. First, microglia  
241 mediate waste removal mainly via phagocytosis (Kettenmann, 2007, Barron, 1995), whereas BLECs take  
242 up their cargos via endocytosis (van Lessen et al., 2017). Second, BLECs are venous derived cells and  
243 sprout from the choroidal vascular plexus in the head (van Lessen et al., 2017, Venero Galanternik et  
244 al., 2017, Bower et al., 2017) whereas microglia stem from a hematopoietic precursor population  
245 (Goldmann et al., 2016). Third, BLECs and microglia are very different in motility. BLECs form a network  
246 of stationary cells, whereas microglia are distributed throughout the brain and use their long cellular  
247 branch extensions to remove dying neurons from the extracellular space (Mazaheri et al., 2014). The  
248 latter would suggest that microglia might be more efficient in clearing the brain from macromolecules,  
249 particularly since they reside in the brain parenchyma while BLECs are not in direct contact with neural  
250 tissue. By directly comparing microglia and BLECs efficacy, we found that BLECs are significantly more  
251 efficient in clearing the brain from the protein we tested, compared to macrophages at 1hpi, 4hpi and  
252 6hpi (Figure 2H). This is counterintuitive, for the reasons mentioned above. Hence, we conclude here  
253 that BLECs fulfill the function of scavenger endothelial cells of the brain that can internalize IgG-  
254 Alexa647 in a very efficient way. Interestingly, within the mammalian liver, there is a similar division of  
255 labour between liver sinusoidal endothelial cells and the liver resident macrophages (Kupffer cells),  
256 which together form the reticuloendothelial system (RES) within this organ, clearing the blood plasma  
257 from endogenous and exogenous waste. We suggest that BLECs and microglia possibly function in a  
258 similar way in the brain.



259 Concerning the spectrum of possible scavenger receptor molecules, we have focused on Mrc1a and  
260 Stab2. We found that Mrc1a mediates the uptake of several substrates (Figure 2D, Figure 5E,H) in BLECs.  
261 Avidin is so far the only substrate that we identified, that completely failed be taken up by the *mrc1a*  
262 mutant cells. Importantly, avidin that is isolated from hen egg white contains abundant high-mannose  
263 glycans (Fiete et al., 1997, DeLange, 1970, Green and Toms, 1970, Bruch and White, 1982).  
264 Glycoproteins containing these glycans are known ligands for the mannose receptor and of such  
265 substances are rapidly cleared from the blood circulation via liver sinusoidal endothelial cells in  
266 mammals (Hubbard et al., 1979). In contrast, transferrin normally does not contain abundant high-  
267 mannose glycans, providing an explanation for the selective requirement for Mrc1a in avidin clearance.

268 Although the other substrates we injected can be internalized via alternative pathways, we show that  
269 also the pHr-Dextran and IgG-Alexa647 uptake is significantly reduced in *mrc1a* receptor mutants,  
270 highlighting the key role of Mrc1a in the removal of different substance classes (Figure 5 E,H). Both of  
271 these substrate classes are known ligands for the mammalian mannose receptor as well (Goetze et al.,  
272 2011, Kato et al., 2000). In *mrc1a* mutant situation other receptors might take over the clearance of  
273 macromolecules, which normally have lower affinity for those particular substrates and might be not as  
274 efficient in internalization of the dyes. This could possibly explain the increased number of BLECs in the  
275 *mrc1a* mutant situation: by increasing cell number and cell surface area and thereby the quantity of  
276 alternative scavenger receptors, mutants may attempt to compensate the loss of Mrc1a by increasing  
277 their overall capacity for the removal of accumulated waste in the brain. A candidate compensating  
278 receptor might be *mrc1b*. However, its expression has not been reported in BLECs (Venero Galanternik  
279 et al., 2017).

280 In addition to the common expression of *mrc1a* in BLECs and SECs, it was previously shown that BLECs  
281 also express Stabilin-2 (Bower et al., 2017), a receptor indispensable for the uptake of liposomes and  
282 hyaluronic acid from the zebrafish circulation (Campbell et al. 2018). Strikingly, and in contrast to BLECs  
283 where pHr-Avidin uptake depends on Mrc1a, pHr-Avidin is still efficiently endocytosed in *mrc1a* mutant  
284 SECs in the CV (Figure 4 A,C). This and the notion that for other substrates uptake efficiency is markedly  
285 reduced in *mrc1a* mutants, supports the conclusion that Mrc1a is important for endocytosis of many  
286 substrates within the meningeal BLECs, but is of less importance in SECs in the CV. Converseley, the  
287 analysis of *stab2* mutant fish revealed that Stabilin-2 is completely dispensable for the uptake of the  
288 endocytosis of all tested substrates in BLECs. Since Stab2 is the main receptor in liver sinusoidal  
289 endothelial cells for the binding of hyaluronic acid in mice (Schledzewski et al., 2011, Adachi and  
290 Tsujimoto, 2002), it is surprising that in *stab2* mutant fish, fluorescent hyaluronic acid can still be  
291 internalized by BLECs. This indicates, that at least in BLECs, additional receptors are involved in the  
292 endocytosis of different macromolecules. Since it has been reported that Stab1 is considered as a  
293 potential endocytosis receptor (Hansen et al., 2005) which is able to mediate the uptake of acetylated  
294 low-density protein and advanced glycation end products (Adachi and Tsujimoto, 2002), it is very likely  
295 that it plays at least a redundant role in macromolecular internalization, and this can be analyzed once  
296 the *stab1* mutants are available. Other potential receptors which would be interesting to look at are  
297 *lyve-1* and *cd44*, which have been reported to constitute hyaluronic acid receptors and to be important  
298 for dendritic cell trafficking in mammals (Johnson et al., 2017). Since *lyve-1* is also expressed in BLECs  
299 (Bower et al., 2017), it might also mediate endocytosis of hyaluronic acid in the BLECs and might play  
300 an essential role for macromolecule internalization. Yet another candidate involved in the  
301 internalization of cargo is Toll-like receptor 2 (TLR2), which forms a complex with the mannose receptor  
302 in macrophages (Tachado et al., 2007) and could be a promising candidate for taking over the  
303 endocytosis of different dyes in the *mrc1a* mutants. Notably, various TLRs including TLR2 are also  
304 expressed in human lymphatic endothelial cells (Garrafa et al., 2011). Future studies therefore need to  
305 investigate additional scavenger receptors, and double or even triple mutants might have to be

306 employed in order to shed more light onto the molecular machinery involved in the endocytosis of  
307 proteins, liposomes, lipoproteins, polysaccharides and glycoaminoglycans.

308 Since the discovery of the mammalian lymphatic vasculature in the brain has recently received  
309 significant attention and has been linked to a clearance system involved in physiological and  
310 pathophysiological conditions such as ageing (Ma et al., 2017) and Alzheimer's disease (Da Mesquita et  
311 al., 2018), the experimental analysis of BLECs provided here adds further insight into how endothelial  
312 cells contribute to the maintenance of brain homeostasis. Since BLECs have the ability to scavenge very  
313 efficiently macromolecules from the brain and qualify as scavenger endothelial cells for the brain, it  
314 raises the question which impact the absence of those cells would have on physiological and  
315 pathological conditions and whether a functionally related cell type might be conserved in mammalian  
316 brains. This needs to be addressed in future studies.

317

318

319

320

321

322



## 323 Materials & Methods

324

### 325 Zebrafish strains

326 Zebrafish strains were maintained under standard husbandry conditions and animal work followed  
327 guidelines of the animal ethics committees at the University of Münster, Germany. The following  
328 transgenic and mutant lines have been used in this study:

329 *Tg(kdr-l:HRAS-mCherry-CAAX)<sup>s916</sup>* (Hogan et al., 2009); *Tg(lyve1:dsRed2)<sup>nz101</sup>* (Okuda et al., 2012),  
330 *Tg(flt4:mCitrine)<sup>hu7135</sup>* (van Impel et al., 2014), *Tg(flt1<sup>enh</sup>:tdTomato)<sup>hu5333</sup>* (Busmann et al., 2010),  
331 *Tg(mpeg1:EGFP)<sup>gl22</sup>* (Ellett et al., 2011)

### 332 CRISPR/Cas9

333 The guide RNA targeting *mrc1a* exon 4 (GGGGACAGTGATCCAGTGAC) was designed using chopchop  
334 algorithm (<https://chopchop.cbu.uib.no/>). sgRNA was synthesized as described previously (Gagnon et  
335 al., 2014). A mixture containing 15 pg of gRNA with 300pg of Cas9 mRNA were injected into the  
336 cytoplasm of one-cell stage zebrafish embryos. The -7bp deletion was identified with primers indicated  
337 in table S1.

338

339 *mrc1a* wt CTCTGGATGGGACAGTGATC**CAGTGACT**TGGTGTATTATATCAGAGGAATGTGCAG  
340 *mrc1a* mt CTCTGGATGGGACAGTGATC-----TGGTGTATTATATCAGAGGAATGTGCAG

341

### 342 Genotyping

343 *mrc1a*<sup>-7bp</sup> and *stab2*<sup>-4bp</sup> embryos were genotyped by KASP using the primers indicated in Table S1.

344

### 345 Injection regimes

346 Injections were carried out with a Pneumatic PicoPump. Embryos were anesthetized and embedded in  
347 1.5% low melting agarose (ThermoFischer, #16520100) dissolved in embryo medium containing MS222  
348 (Sigma, #A5040) and injected with a total volume of 0.5 nl - 1 nl per injected bolus. For intratectal  
349 injection and injection into the cerebrospinal fluid, needles were inserted into the brain in a sloped  
350 angle. Care was taken not to penetrate deep into the brain tissue.

351

### 352 Dyes

353 The following fluorescent dyes and concentrations were used for injection: 10 kDa dextran-conjugated  
354 Alexa Fluor 647 (2mg/ml, ThermoFischer, #D22914), pHrodo Red Avidin (2 mg/ml, ThermoFischer,  
355 #P35362), pHrodo Red Dextran (2mg/mL, P10361), pHrhodo Green Dextran (2mg/mL, P35368), acLDL  
356 (1mg/ml, Thermo Fischer, L23380), oxLDL (1mg/ml, Thermo Fischer L34357), Transferrin (2mg/ml,  
357 Thermo Fischer, T23366, fluoHA Hyaluronic acid (sodium salt, 100kDa) was purchased from Lifecore  
358 Biomedical Inc. DOPG liposomes were prepared as previously described (Campbell et al. (2018).

359

### 360 Imaging

361 Embryos were anesthetized with MS222 (Sigma, #A5040) and embedded in 1% low melting agarose  
362 (ThermoFischer, #16520100).

363

### 364 Microscopy and image processing

365 Samples were imaged with a Leica SP8 microscope using 20x dry objectives and 40x water immersion  
366 objectives. Confocal stacks were processed using Fiji-ImageJ version 1.51g and figures were assembled

367 using Microsoft Power Point and Adobe Photoshop and Adobe Illustrator. All data were processed  
368 using raw images with brightness, color and contrast adjusted for printing.

369

370

### 371 Particle Analysis

372 Confocal maximum projections of IgG-Alexa 647 and acLDL were analyzed as follows:

```
373 roiManager("reset");  
374 run("Duplicate...", " ");  
375 run("Duplicate...", " ");  
376 run("Median...", "radius=2");  
377 run("Enhance Contrast...", "saturated=0.6 normalize");  
378 run("Threshold...");  
379 setThreshold(60, 255);  
380 setOption("BlackBackground", true);  
381 run("Convert to Mask");  
382 run("Analyze Particles...", " show=Outlines add");  
383 run("Tile");  
384 waitForUser("select original");  
385 roiManager("deselect");  
386 roiManager("multi-measure measure_all");
```

387

```
388 roiManager("deselect");
```

389

390 Confocal maximum projections of pHR-Dextran were analyzed as follows:

391

```
392 roiManager("reset");  
393 run("Duplicate...", " ");  
394 run("Duplicate...", " ");  
395 run("Median...", "radius=2");  
396 run("Enhance Contrast...", "saturated=0.4 normalize");  
397 run("Threshold...");  
398 setThreshold(110, 255);  
399 setOption("BlackBackground", true);  
400 run("Convert to Mask");  
401 run("Analyze Particles...", " show=Outlines add");  
402 run("Tile");  
403 waitForUser("select original");  
404 roiManager("deselect");  
405 roiManager("multi-measure measure_all");
```

406

```
407 roiManager("deselect");
```

### 408 Statistical analysis

409 Data sets were tested for normality (Shapiro-Wilk) and equal variance. P-values were determined by  
410 Student's t-test. When normality test failed, Mann-Whitney test was performed.

411

412 **Table S1**

| Primer           | Primer sequence                               |
|------------------|-----------------------------------------------|
| Mrc1aKASPAR_wt   | GAAGGTGACCAAGTTCATGCTCAGCTCTGGATGGGACAGTGATCC |
| Mrc1aKASPAR_mt   | GAAGGTCGGAGTCAACGGATTCAGCTCTGGATGGGACAGTGATCT |
| Mrc1a_C2         | CCAAGTCAGTATTGACTGCACATTCCTCT                 |
| Stab2KASPAR_wtfw | GAAGGTGACCAAGTTCATGCTTTATGCAGCAATCAACCCGTGC   |
| Stab2KASPAR_mtfw | GAAGGTCGGAGTCAACGGATTTTATGCAGCAATCAACCCGTGA   |
| Stab2_C2_rv      | CACTGCATTTCGCATGGCACAC                        |

413

414

415

416

## 417 Literature

- 418 ABSINTA, M., HA, S. K., NAIR, G., SATI, P., LUCIANO, N. J., PALISOC, M., LOUVEAU, A., ZAGHLOUL, K.  
419 A., PITTALUGA, S., KIPNIS, J. & REICH, D. S. 2017. Human and nonhuman primate meninges  
420 harbor lymphatic vessels that can be visualized noninvasively by MRI. *Elife*, 6.
- 421 ADACHI, H. & TSUJIMOTO, M. 2002. FEEL-1, a novel scavenger receptor with in vitro bacteria-binding  
422 and angiogenesis-modulating activities. *J Biol Chem*, 277, 34264-70.
- 423 ANTILA, S., KARAMAN, S., NURMI, H., AIRAVAARA, M., VOUTILAINEN, M. H., MATHIVET, T., CHILOV,  
424 D., LI, Z., KOPPINEN, T., PARK, J. H., FANG, S., ASPELUND, A., SAARMA, M., EICHMANN, A.,  
425 THOMAS, J. L. & ALITALO, K. 2017. Development and plasticity of meningeal lymphatic  
426 vessels. *J Exp Med*, 214, 3645-3667.
- 427 ASPELUND, A., ANTILA, S., PROULX, S. T., KARLSEN, T. V., KARAMAN, S., DETMAR, M., WIIG, H. &  
428 ALITALO, K. 2015. A dural lymphatic vascular system that drains brain interstitial fluid and  
429 macromolecules. *J Exp Med*, 212, 991-9.
- 430 BARRON, K. D. 1995. The microglial cell. A historical review. *J Neurol Sci*, 134 Suppl, 57-68.
- 431 BOWER, N. I., KOLTOWSKA, K., PICHOL-THIEVEND, C., VIRSHUP, I., PATERSON, S., LAGENDIJK, A. K.,  
432 WANG, W., LINDSEY, B. W., BENT, S. J., BAEK, S., RONDON-GALEANO, M., HURLEY, D. G.,  
433 MOCHIZUKI, N., SIMONS, C., FRANCOIS, M., WELLS, C. A., KASLIN, J. & HOGAN, B. M. 2017.  
434 Mural lymphatic endothelial cells regulate meningeal angiogenesis in the zebrafish. *Nat*  
435 *Neurosci*, 20, 774-783.
- 436 BRUCH, R. C. & WHITE, H. B. 1982. Compositional and structural heterogeneity of avidin  
437 glycopeptides. *Biochemistry*, 21, 5334-5341.
- 438 BUSSMANN, J., BOS, F. L., URASAKI, A., KAWAKAMI, K., DUCKERS, H. J. & SCHULTE-MERKER, S. 2010.  
439 Arteries provide essential guidance cues for lymphatic endothelial cells in the zebrafish trunk.  
440 *Development*, 137, 2653-7.
- 441 CAMPBELL, F., BOS, F. L., SIEBER, S., ARIAS-ALPIZAR, G., KOCH, B. E., HUWYLER, J., KROS, A. &  
442 BUSSMANN, J. 2018. Directing Nanoparticle Biodistribution through Evasion and Exploitation  
443 of Stab2-Dependent Nanoparticle Uptake. *ACS Nano*, 12, 2138-2150.
- 444 CHEN, J., HE, J., NI, R., YANG, Q., ZHANG, Y. & LUO, L. 2019. Cerebrovascular Injuries Induce  
445 Lymphatic Invasion into Brain Parenchyma to Guide Vascular Regeneration in Zebrafish. *Dev*  
446 *Cell*, 49, 697-710.e5.
- 447 DA MESQUITA, S., LOUVEAU, A., VACCARI, A., SMIRNOV, I., CORNELISON, R. C., KINGSMORE, K. M.,  
448 CONTARINO, C., ONENGUT-GUMUSCU, S., FARBER, E., RAPER, D., VIAR, K. E., POWELL, R. D.,  
449 BAKER, W., DABHI, N., BAI, R., CAO, R., HU, S., RICH, S. S., MUNSON, J. M., LOPES, M. B.,  
450 OVERALL, C. C., ACTON, S. T. & KIPNIS, J. 2018. Functional aspects of meningeal lymphatics in  
451 ageing and Alzheimer's disease. *Nature*, 560, 185-191.
- 452 DELANGE, R. J. 1970. Egg White Avidin: I. AMINO ACID COMPOSITION; SEQUENCE OF THE AMINO-  
453 AND CARBOXYL-TERMINAL CYANOGEN BROMIDE PEPTIDES. *Journal of Biological Chemistry*,  
454 245, 907-916.
- 455 ELLETT, F., PASE, L., HAYMAN, J. W., ANDRIANOPOULOS, A. & LIESCHKE, G. J. 2011. mpeg1 promoter  
456 transgenes direct macrophage-lineage expression in zebrafish. *Blood*, 117, e49-56.
- 457 FIETE, D., BERANEK, M. C. & BAENZIGER, J. U. 1997. The macrophage/endothelial cell mannose  
458 receptor cDNA encodes a protein that binds oligosaccharides terminating with  
459 SO<sub>4</sub>-4-GalNAc $\beta$ 1,4GlcNAc $\beta$  or Man at independent sites. *Proceedings of the*  
460 *National Academy of Sciences*, 94, 11256-11261.
- 461 GAGNON, J. A., VALEN, E., THYME, S. B., HUANG, P., AKHMETOVA, L., PAULI, A., MONTAGUE, T. G.,  
462 ZIMMERMAN, S., RICHTER, C. & SCHIER, A. F. 2014. Efficient mutagenesis by Cas9 protein-  
463 mediated oligonucleotide insertion and large-scale assessment of single-guide RNAs. *PLoS*  
464 *One*, 9, e98186.
- 465 GARRAFA, E., IMBERTI, L., TIBERIO, G., PRANDINI, A., GIULINI, S. M. & CAIMI, L. 2011. Heterogeneous  
466 expression of toll-like receptors in lymphatic endothelial cells derived from different tissues.  
467 *Immunol Cell Biol*, 89, 475-81.

- 468 GOETZE, A. M., LIU, Y. D., ZHANG, Z., SHAH, B., LEE, E., BONDARENKO, P. V. & FLYNN, G. C. 2011.  
469 High-mannose glycans on the Fc region of therapeutic IgG antibodies increase serum  
470 clearance in humans. *Glycobiology*, 21, 949-959.
- 471 GOLDMANN, T., WIEGHOFER, P., JORDAO, M. J., PRUTEK, F., HAGEMEYER, N., FRENZEL, K., AMANN,  
472 L., STASZEWSKI, O., KIERDORF, K., KRUEGER, M., LOCATELLI, G., HOCHGERNER, H., ZEISER, R.,  
473 EPELMAN, S., GEISSMANN, F., PRILLER, J., ROSSI, F. M., BECHMANN, I., KERSCHENSTEINER,  
474 M., LINNARSSON, S., JUNG, S. & PRINZ, M. 2016. Origin, fate and dynamics of macrophages  
475 at central nervous system interfaces. *Nat Immunol*, 17, 797-805.
- 476 GREEN, N. M. & TOMS, E. J. 1970. Purification and crystallization of avidin. *Biochemical Journal*, 118,  
477 67-70.
- 478 HANSEN, B., LONGATI, P., ELVEVOLD, K., NEDREDAL, G. I., SCHLEDZEWSKI, K., OLSEN, R., FALKOWSKI,  
479 M., KZHYSKOWSKA, J., CARLSSON, F., JOHANSSON, S., SMEDSRØD, B., GOERDT, S.,  
480 JOHANSSON, S. & MCCOURT, P. 2005. Stabilin-1 and stabilin-2 are both directed into the  
481 early endocytic pathway in hepatic sinusoidal endothelium via interactions with clathrin/AP-  
482 2, independent of ligand binding. *Exp Cell Res*, 303, 160-73.
- 483 HOGAN, B. M., BOS, F. L., BUSSMANN, J., WITTE, M., CHI, N. C., DUCKERS, H. J. & SCHULTE-MERKER,  
484 S. 2009. Ccbe1 is required for embryonic lymphangiogenesis and venous sprouting. *Nat*  
485 *Genet*, 41, 396-8.
- 486 HUBBARD, A. L., WILSON, G., ASHWELL, G. & STUKENBROK, H. 1979. An electron microscope  
487 autoradiographic study of the carbohydrate recognition systems in rat liver. I. Distribution of  
488 125I-ligands among the liver cell types. *The Journal of Cell Biology*, 83, 47-64.
- 489 JOHNSON, L. A., BANERJI, S., LAWRENCE, W., GILEADI, U., PROTA, G., HOLDER, K. A., ROSHORM, Y.  
490 M., HANKE, T., CERUNDOLO, V., GALE, N. W. & JACKSON, D. G. 2017. Dendritic cells enter  
491 lymph vessels by hyaluronan-mediated docking to the endothelial receptor LYVE-1. *Nature*  
492 *Immunology*, 18, 762.
- 493 KATO, M., NEIL, T. K., FEARNLEY, D. B., MCLELLAN, A. D., VUCKOVIC, S. & HART, D. N. J. 2000.  
494 Expression of multilectin receptors and comparative FITC-dextran uptake by human  
495 dendritic cells. *International Immunology*, 12, 1511-1519.
- 496 KETTENMANN, H. 2007. The brain's garbage men. *Nature*, 446, 987.
- 497 LEE, S. J., EVERS, S., ROEDER, D., PARLOW, A. F., RISTELI, J., RISTELI, L., LEE, Y. C., FEIZI, T., LANGEN, H.  
498 & NUSSENZWEIG, M. C. 2002. Mannose receptor-mediated regulation of serum glycoprotein  
499 homeostasis. *Science*, 295, 1898-901.
- 500 LOUVEAU, A., SMIRNOV, I., KEYES, T. J., ECCLES, J. D., ROUHANI, S. J., PESKE, J. D., DERECKI, N. C.,  
501 CASTLE, D., MANDELL, J. W., LEE, K. S., HARRIS, T. H. & KIPNIS, J. 2015. Structural and  
502 functional features of central nervous system lymphatic vessels. *Nature*, 523, 337-41.
- 503 MA, Q., INEICHEN, B. V., DETMAR, M. & PROULX, S. T. 2017. Outflow of cerebrospinal fluid is  
504 predominantly through lymphatic vessels and is reduced in aged mice. *Nature*  
505 *Communications*, 8, 1434.
- 506 MALOVIC, I., SØRENSEN, K. K., ELVEVOLD, K. H., NEDREDAL, G. I., PAULSEN, S., EROFEEV, A. V.,  
507 SMEDSRØD, B. H. & MCCOURT, P. A. G. 2007. The mannose receptor on murine liver  
508 sinusoidal endothelial cells is the main denatured collagen clearance receptor. *Hepatology*,  
509 45, 1454-1461.
- 510 MASCAGNI, P. & BELLINI, G. B. 1816. *Istoria completa dei vasi linfatici*, E. Pacini.
- 511 MAZAHERI, F., BREUS, O., DURDU, S., HAAS, P., WITTBRODT, J., GILMOUR, D. & PERI, F. 2014. Distinct  
512 roles for BAI1 and TIM-4 in the engulfment of dying neurons by microglia. *Nature*  
513 *Communications*, 5, 4046.
- 514 METCALF, D. J., GARCIA-ARENCEBIA, M., HOCHFELD, W. E. & RUBINSZTEIN, D. C. 2012. Autophagy and  
515 misfolded proteins in neurodegeneration. *Exp Neurol*, 238, 22-8.
- 516 MI, Y., SHAPIRO, S. D. & BAENZIGER, J. U. 2002. Regulation of lutropin circulatory half-life by the  
517 mannose/N-acetylgalactosamine-4-SO<sub>4</sub> receptor is critical for implantation in vivo. *J Clin*  
518 *Invest*, 109, 269-76.

- 519 OKUDA, K. S., ASTIN, J. W., MISA, J. P., FLORES, M. V., CROSIER, K. E. & CROSIER, P. S. 2012. Iyve1  
520 expression reveals novel lymphatic vessels and new mechanisms for lymphatic vessel  
521 development in zebrafish. *Development*, 139, 2381-91.
- 522 PLATT, N., DA SILVA, R. P. & GORDON, S. 1998. Recognizing death: the phagocytosis of apoptotic  
523 cells. *Trends Cell Biol*, 8, 365-72.
- 524 SALLUSTO, F., CELLA, M., DANIELI, C. & LANZAVECCHIA, A. 1995. Dendritic cells use macropinocytosis  
525 and the mannose receptor to concentrate macromolecules in the major histocompatibility  
526 complex class II compartment: downregulation by cytokines and bacterial products. *J Exp  
527 Med*, 182, 389-400.
- 528 SCHLEDZEWSKI, K., GERAUD, C., ARNOLD, B., WANG, S., GRONE, H. J., KEMPF, T., WOLLERT, K. C.,  
529 STRAUB, B. K., SCHIRMACHER, P., DEMORY, A., SCHONHABER, H., GRATCHEV, A., DIETZ, L.,  
530 THIERSE, H. J., KZHYSKOWSKA, J. & GOERDT, S. 2011. Deficiency of liver sinusoidal  
531 scavenger receptors stabilin-1 and -2 in mice causes glomerulofibrotic nephropathy via  
532 impaired hepatic clearance of noxious blood factors. *J Clin Invest*, 121, 703-14.
- 533 SCHULTE-MERKER, S., SABINE, A. & PETROVA, T. V. 2011. Lymphatic vascular morphogenesis in  
534 development, physiology, and disease. *J Cell Biol*, 193, 607-18.
- 535 SETERNES, T., SORENSEN, K. & SMEDSRDOD, B. 2002. Scavenger endothelial cells of vertebrates: a  
536 nonperipheral leukocyte system for high-capacity elimination of waste macromolecules. *Proc  
537 Natl Acad Sci U S A*, 99, 7594-7.
- 538 TACHADO, S. D., ZHANG, J., ZHU, J., PATEL, N., CUSHION, M. & KOZIEL, H. 2007. Pneumocystis-  
539 mediated IL-8 release by macrophages requires coexpression of mannose receptors and  
540 TLR2. *J Leukoc Biol*, 81, 205-11.
- 541 VAN IMPEL, A., ZHAO, Z., HERMKENS, D. M., ROUKENS, M. G., FISCHER, J. C., PETERSON-MADURO, J.,  
542 DUCKERS, H., OBER, E. A., INGHAM, P. W. & SCHULTE-MERKER, S. 2014. Divergence of  
543 zebrafish and mouse lymphatic cell fate specification pathways. *Development*, 141, 1228-38.
- 544 VAN LESSEN, M., SHIBATA-GERMANOS, S., VAN IMPEL, A., HAWKINS, T. A., RIHEL, J. & SCHULTE-  
545 MERKER, S. 2017. Intracellular uptake of macromolecules by brain lymphatic endothelial cells  
546 during zebrafish embryonic development. *Elife*, 6.
- 547 VENERO GALANTERNIK, M., CASTRANOVA, D., GORE, A. V., BLEWETT, N. H., JUNG, H. M., STRATMAN,  
548 A. N., KIRBY, M. R., IBEN, J., MILLER, M. F., KAWAKAMI, K., MARAIA, R. J. & WEINSTEIN, B. M.  
549 2017. A novel perivascular cell population in the zebrafish brain. *Elife*, 6.

## 550 Funding

551 *Deutsche Forschungsgemeinschaft (FOR2325)*

- 552 • Stefan Schulte-Merker

553 The funders had no role in study design, data collection and interpretation, or the decision to  
554 submit the work for publication.

## 555 Competing interests

556 None

## 557 Acknowledgements

558 We thank members of the Schulte-Merker lab for discussions, D Stainier for providing  
559 transgenic fish lines and F. Campbell for preparing DOPG liposomes. The work was supported  
560 by the DFG (SCHU 1228/2-1, Forschergruppe FOR2325, Interactions at the Neurovascular  
561 Interface) and the CiM Cluster of Excellence (EXC 1003 CiM, WWU Münster, Germany).  
562 Furthermore we thank Thomas Zobel for programming the macro for the quantification of the  
563 fluorescence intensity in Fiji.



564 **Ethics**

565 Animal experimentation: Experimental procedures were conducted under project licence.

566

567

Figure 1

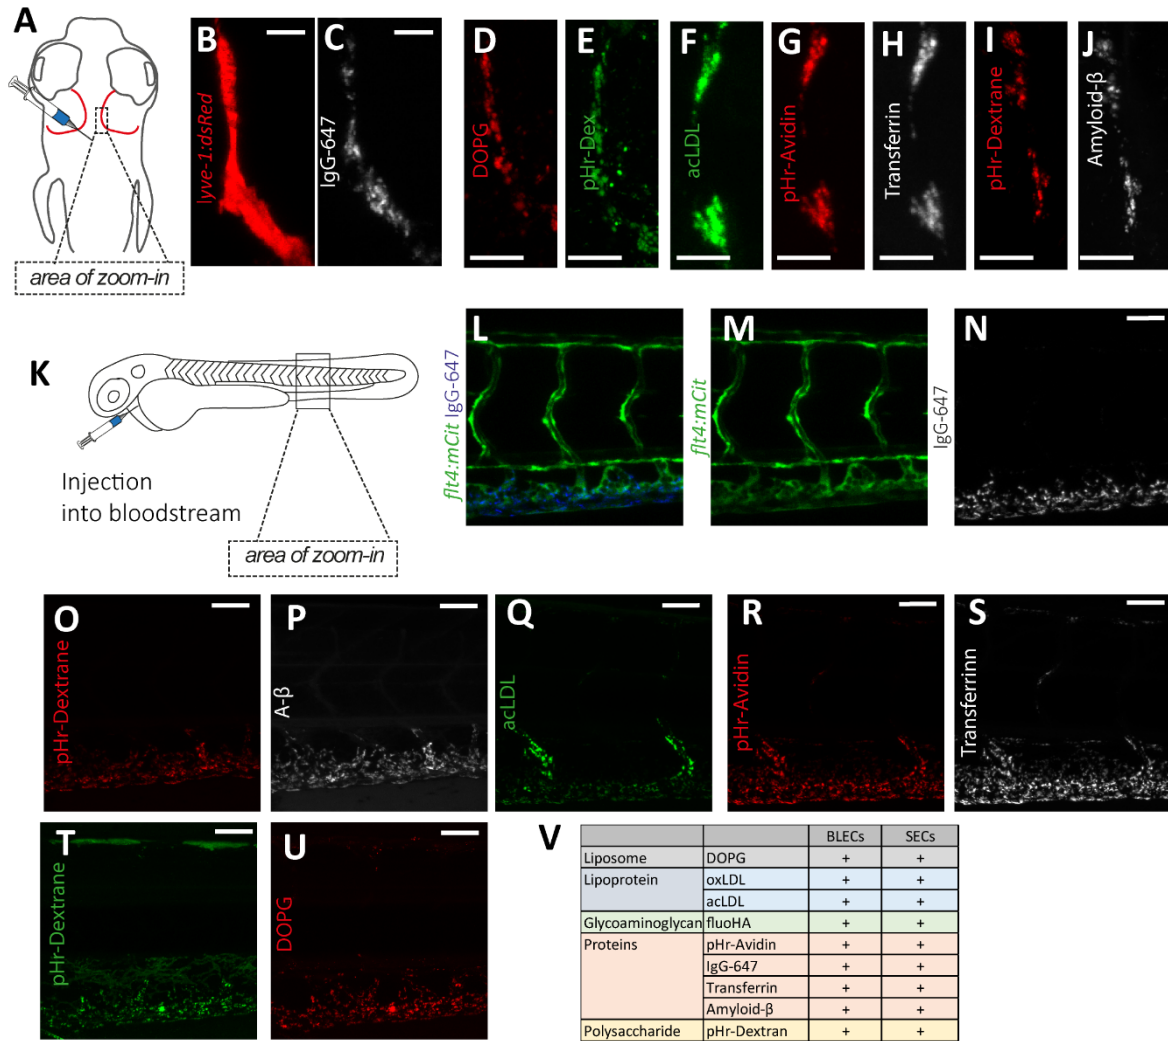

Figure 2

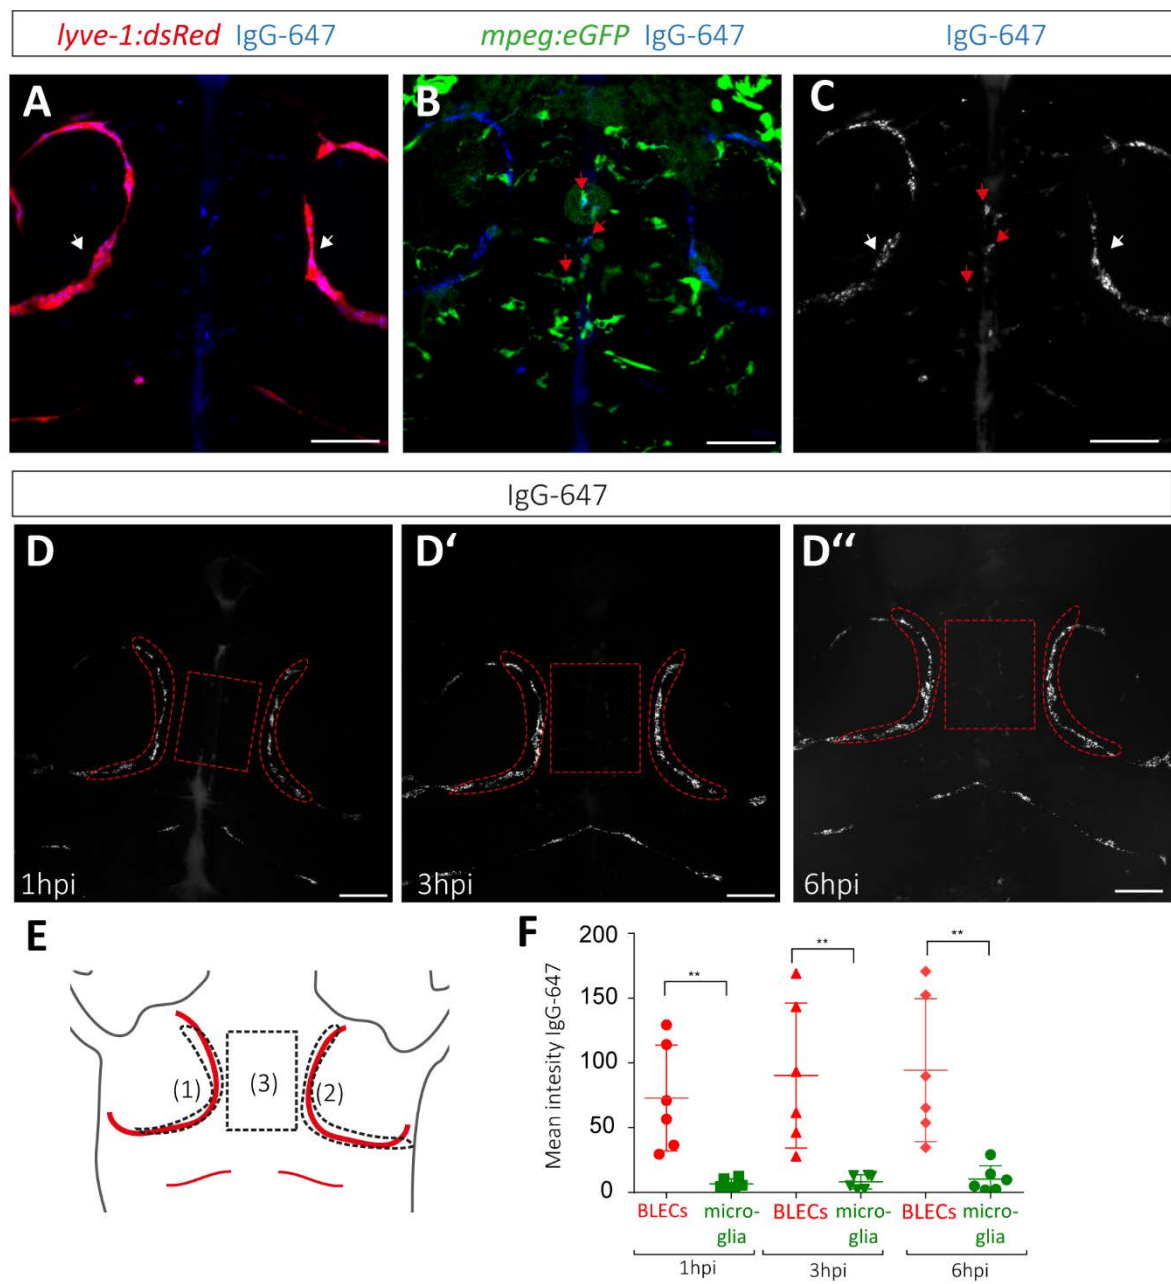

Figure 3

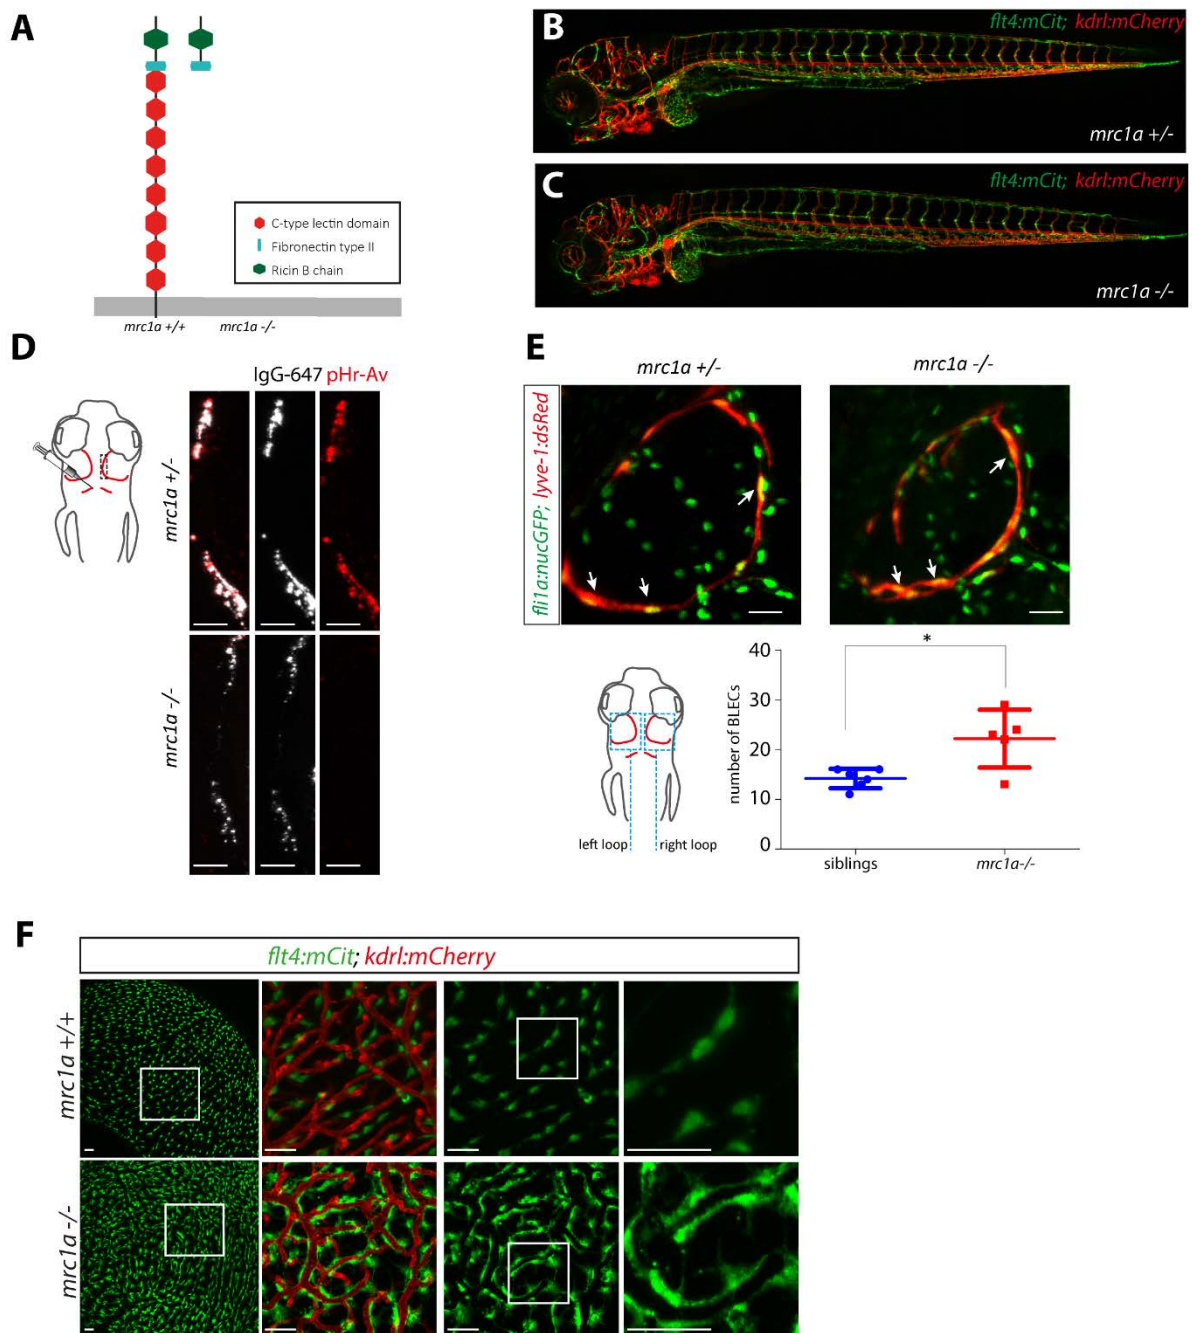

Figure 4

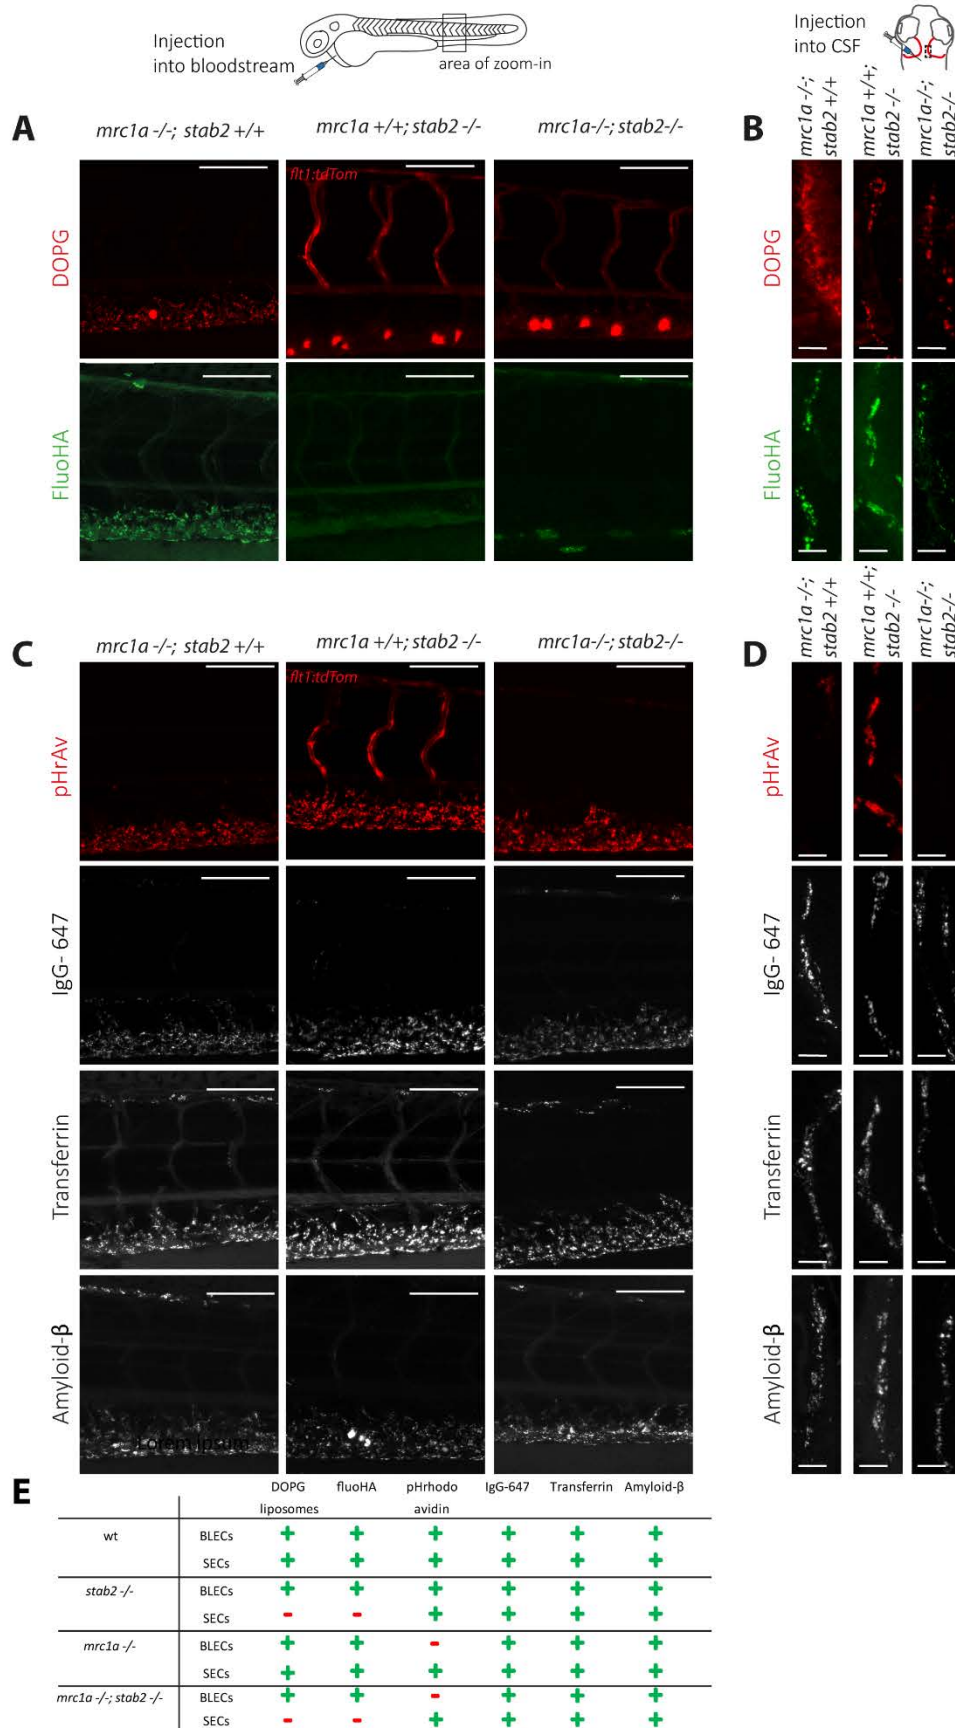

Figure 5

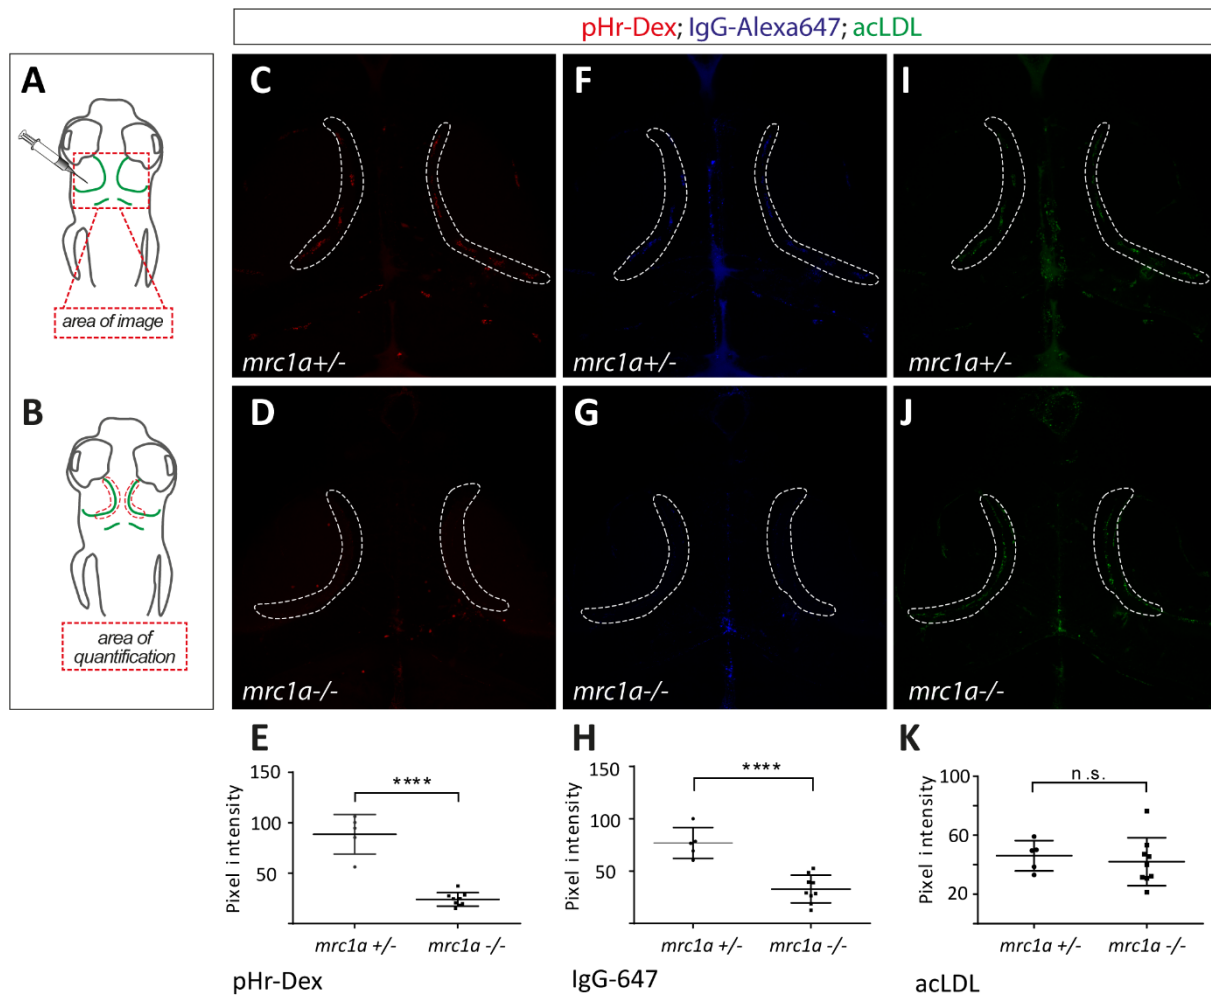



Supplemental Figure 1

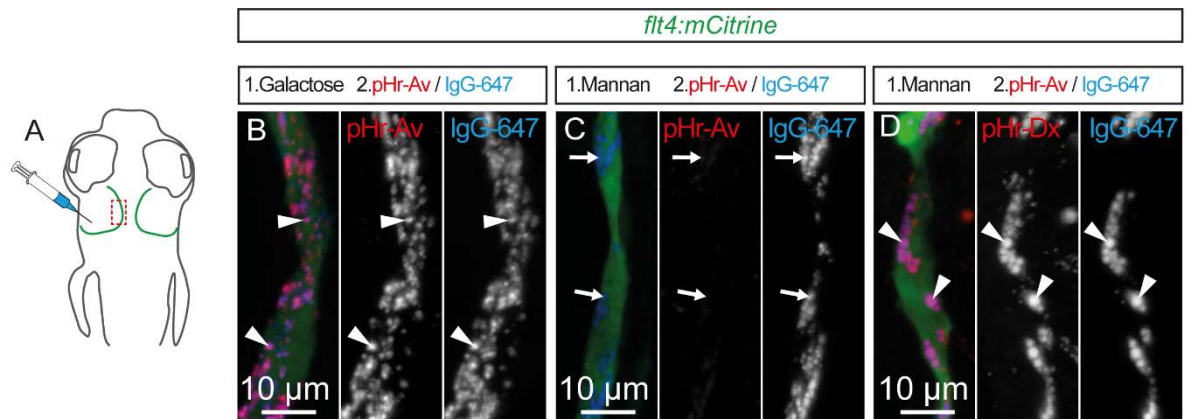

Supplemental Figure 2

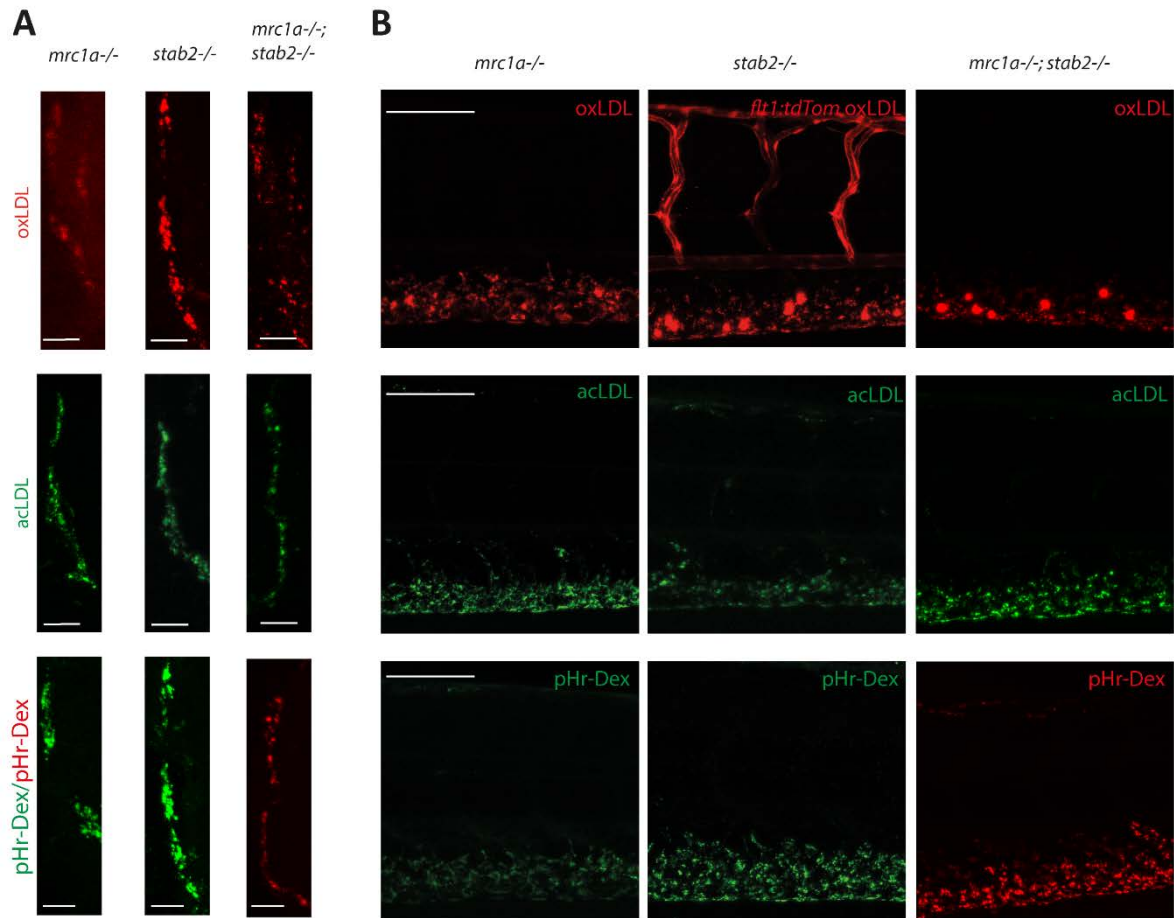

**C**

|                                                           |       | pHr-Dex | oxLDL | acLDL |
|-----------------------------------------------------------|-------|---------|-------|-------|
| <i>wt</i>                                                 | BLECs | +       | +     | +     |
|                                                           | SECs  | +       | +     | +     |
| <i>stab2</i> <sup>-/-</sup>                               | BLECs | +       | +     | +     |
|                                                           | SECs  | +       | +     | +     |
| <i>mrc1a</i> <sup>-/-</sup>                               | BLECs | +       | +     | +     |
|                                                           | SECs  | +       | +     | +     |
| <i>mrc1a</i> <sup>-/-</sup> ; <i>stab2</i> <sup>-/-</sup> | BLECs | +       | +     | +     |
|                                                           | SECs  | +       | +     | +     |

**Figure 1: Brain lymphatic endothelial cells (BLECs) in the meningeal layer and sinusoidal endothelial cells (SECs) in the common cardinal vein (CCV) share the same substrate specificity.**

(A) Overview of the zebrafish head region (dorsal view, anterior at the top) with the position of BLECs highlighted in red. The boxed area indicates the position of the imaged BLECs shown in B-J. Injection of different fluorescent substrate molecules was performed either into the center of the optic tectum (TeO), close to the meninges, or into the cerebrospinal canal, imaged in C-J. (B,C) Uptake of IgG-Alexa647 by BLECs. Confocal projections of a *lyve1:DsRed* positive BLEC (B), which has internalized the fluorescent IgG-Alexa647 (C) that was administered as described in A. (D-J) Confocal projections of different classes of DOPG (D), dextran-488 (E), acLDL (F), pHr-Avidin (G), Transferrin (H), dextran-565 (I) and Amyloid- $\beta$  (J) internalized by BLECs. A-J Scale bar represents 12.5 $\mu$ m. (K) Schematic overview of a zebrafish embryo, indicating injections of different fluorescent dyes into the blood stream. The boxed area highlights the location of the CCV that was imaged in (L-U). (L) Confocal pictures of *flt4:mCitrine* transgene (M) and the uptake of IgG-Alexa647 (N), pHr-Dextran-565(O), Amyloid- $\beta$  (P), acLDL (Q), pHr-Avidin (R), Transferrin (S), pHr-Dextran-488(T) and DOPG (U) by SECs located in the CV. (L,M,N,T,U) *mrc1a*<sup>+/-</sup> (O-S) wild type embryo. (V) Summary of the fluorescent substrate molecule uptake experiments; K-U scale bar represents 50 $\mu$ m.

pHr-Dex – pHr-Dextrane; DOPG - 1,2-dioleoyl-sn-glycero-3-phospho-(1'-rac-glycerol); acLDL-acetylated LDL; oxLDL – oxidated LDL; fluoHA- fluorescent hyaluronic acid; IgG-647 – IgG-Alexa647

**Figure 2: BLECs on the optic tectum are more efficient in the uptake of exogenous substrate than microglia.**

(A-C) Confocal projection of the head region (dorsal view, anterior to the top) of a *lyve1:dsRed;mpeg:eGFP* double transgenic embryo, injected with IgG-Alexa647 at 5dpf. (A) Composite of *lyve1* expressing BLECs (white arrow) and IgG-Alexa647. (B) Composite of *mpeg:eGFP* positive microglia and IgG-Alexa647. As an example, three IgG-Alexa647 accumulating microglia cells are highlighted with red arrows. (C) Maximum projection of IgG-Alexa647. (D'-D'') Maximum projection of the same IgG-Alexa647 injected embryo at 1hpi (D), 3hpi (D'), and 6hpi (D''). (E) Schematic overview of the regions that were used for the uptake quantifications: BLECs within the left loop (1), the right loop (2), and the microglia positioned in between the loops (3). The identical areas are also indicated in the confocal projections in D-D''. (F) Quantification of the mean intensity above zero of IgG-Alexa647 of the two loops (region1+region2)/2 versus microglia cells at 1hpi (test p=0,0027), 3hpi (Mann-Whitney test p=0,0022) and 6hpi (Mann-Whitney test p=0,0022). The scale bar indicates 50 $\mu$ m. \*\* equals p < 0,01.

BLECs- brain lymphatic endothelial cells; IgG-647 – IgG-Alexa647

**Figure 3: *mrc1a* is indispensable for the uptake of pHr-Avidin.**

(A) Predicted wild type Mrc1a domain structure and predicted protein structure of the mutant allele. (B,C) Confocal picture of *flt4:mCit;kdr1:mCherry* double transgenic embryos at 5dpf, with no obvious lymphatic or vascular phenotype defects in *mrc1a* homozygous embryos. (D) Confocal picture of embryos injected with IgG-Alexa647 and pHr-Avidin, demonstrating that the uptake of pHr-Avidin is blocked in *mrc1a* mutant embryos, whereas the uptake of IgG-Alexa647 is not affected. Scale bar represents 12,5 $\mu$ m. (E) Confocal picture of *lyve1a:dsRed;nucfli1a:GFP* double transgenic embryos. BLEC numbers in both loops on the optic tectum were counted in *Tglyve1a:dsRed;nucfli1a:GFP* embryos. 3 arrows are pointing to 3 positive cells, co-expressing both *lyve1a* and *nucfli1a:GFP*. Scale bar represents 25 $\mu$ m. *mrc1a* mutants have on average 22 BLECs in both loops (n=5) whereas their siblings have 14 BLECs (n=6) at 5dpf (mean  $\pm$ SEM measured in both loops) (t-test sibling versus *mrc1a*<sup>-/\*</sup> p=0,012). (F) Brains of 4 months old adult fish *Tg(flt4:mCit;kdr1:mCherry)* highlighting BLECs (green) and blood vessels (red). Squares indicate the enlarged regions to the immediate right. The scale bar represents 50 $\mu$ m.

pHr-Av – pHr-Avidin

**Figure 4: Differential involvement of Stab2 and Mrc1a receptors during the uptake of cargo molecules by BLECs and SECs.** Analysis of dye uptake into SECs and BLECs of either *mrc1a*<sup>-/-</sup> or *stab2*<sup>-/-</sup> single mutants, or of *mrc1a*<sup>-/-</sup>; *stab2*<sup>-/-</sup> double mutant embryos. (A) Confocal images showing the accumulation of DOPG and fluoHA within SECs of the CV after dye administration into the bloodstream of embryos with the indicated genotypes. (B) DOPG and fluoHA uptake by BLECs after injection into the CSF or the optic tectum. (C) Confocal picture showing uptake of pHr-Avidin, IgG-Alexa647, Transferrin and Amyloid-β by SECs, which were administered to the bloodstream. (D) Confocal projections of pHr-Avidin, IgG-Alexa647, Transferrin and Amyloid-β uptake by BLECs, after injection into the CSF or the optic tectum. (E) Table summarizing the uptake of the different dyes by BLECs and SECs. Scale bar in A,C represents 100μm, and in B,D 12.5μm, respectively.

pHr-Av – pHr-Avidin; DOPG - 1,2-dioleoyl-sn-glycero-3-phospho-(1' -rac-glycerol); fluoHA- fluorescent hyaluronic acid; IgG-647 – IgG-Alexa647

**Figure 5: *mrc1a* mutants show a significantly reduced uptake of dextran and IgG-647 by BLECs.** (A) Cartoons depicting the imaging area within the head region and the injection site of the different fluorescently labelled molecules. Dorsal view and anterior to the top in all images. All three substrates (acLDL-488; pHr-Dextran-564 and IgG-Alexa647) were co-injected into the same embryo. A total of 9 mutants and 6 heterozygous embryos were analyzed for each dye. (B) Overview of the area used for quantification, which is also indicated in the confocal projections (C,D,F,G,I,J). (C,D,E) *mrc1a* mutant BLECs take up significantly less dextran (mean ±SEM measured in each loop) (t-test sibling versus *mrc1a*<sup>-/-</sup> \*\*\*\* p<0.0001) and less IgG-647 (F,G,H) (mean ±SEM measured in each loop) (t-test sibling versus *mrc1a*<sup>-/-</sup> \*\*\*\* p<0.0001) compared to their heterozygous siblings. (I, J, K) No difference in uptake by the BLECs was found in case of acLDL (mean ±SEM measured in each loop) (t-test sibling versus *mrc1a*<sup>-/-</sup>, p=0,63). Pixel intensity was analyzed using Fiji software.

pHr-Dex – pHr-Dextrane; acLDL- acetylated LDL; IgG-647 – IgG-Alexa647

**Supplemental Figure 1: Separate, consecutive injection of fluorescent dyes over time labels the same lyso-endosomal compartments.** (A) Overview of the zebrafish head region depicting intratectal injection of compounds and fluorescent dyes into the center of the TeO close to the meninges in 5dpf embryos. Red inset denotes area of image detail for representative dorsal confocal projections of BLECs in B-D. (B – D) Numbers in headers denote order of separate, consecutive injections. Consecutive injection of indicated fluorescent dyes and mannan (separated by a ten minutes time interval) over time labels the same lyso-endosomal compartments. After initial administration and uptake, the injection of mannan blocks further uptake of pHr-Av. At 20 minutes after the administration of IgG-647, most pHr-Av positive lyso-endosomal compartments are IgG-647 negative. After further incubation, at 60 minutes, the majority of pHr-Av positive compartments show accumulation of IgG-647 tracer.

BLEC, brain lymphatic endothelial cell; dpf, days post fertilization; IgG-647, IgG-conjugated Alexa Fluor 674; pHr-Av, pHrodo™ Red Avidin; TeO, Optic Tectum.

**Supplemental Figure 2: Involvement of Stab2 and Mrc1a receptor during cargo uptake by BLECs and SECs.** Analysis of dye uptake of SECs and BLECs of either *mrc1a*<sup>-/-</sup> or *stab2*<sup>-/-</sup> single mutants, or of *mrc1a*<sup>-/-</sup>; *stab2*<sup>-/-</sup> double mutant embryos. (A+B) Confocal images of cargo injections showing the accumulation of oxLDL and acLDL pHr-Dextran in BLECs after injection into the CSF or the optic tectum (A) and SECs of the CV after dye administration into the bloodstream of embryos (B) with the indicated genotypes. (C) Summary of the fluorescent substrate molecule uptake experiments.

pHr-Dex – pHr-Dextrane; acLDL- acetylated LDL; oxLDL- oxidated LDL
